# Supplementary material for: Steroids Enable Mesenchymal Stromal Cells to Promote CD8+ T Cell Proliferation Via VEGF‐C
Source: PubMed Central journal article supplement (PMC8224440; doi:10.1002/advs.202003712), 2021-05-02
Supplement: ADVS-8-2003712-s001.pdf [file ADVS-8-2003712-s001.pdf]

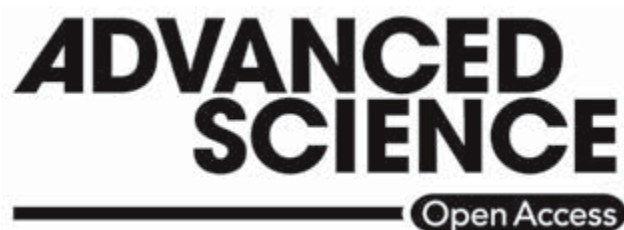

## Supporting Information

for *Adv. Sci.*, DOI: 10.1002/adv.202003712

### Steroids Enable Mesenchymal Stromal Cells to Promote CD8<sup>+</sup> T Cell Proliferation via VEGF-C

*Yurun Gan, Tao Zhang, Xiaodong Chen, Wei Cao, Liangyu Lin, Liming Du, Yu Wang, Fei Zhou, Xuefeng He, Yulong He, Jianhe Gan, Huiming Sheng, Lydia Sorokin, Yufang Shi<sup>\*</sup>, and Ying Wang<sup>\*</sup>*

Supporting Information

**Steroids Enable Mesenchymal Stromal Cells to Promote CD8<sup>+</sup> T cell Proliferation via VEGF-C**

*Yurun Gan, Tao Zhang, Xiaodong Chen, Wei Cao, Liangyu Lin, Liming Du, Yu Wang, Fei Zhou, Xuefeng He, Yulong He, Jianhe Gan, Huiming Sheng, Lydia Sorokin, Yufang Shi<sup>\*</sup>, and Ying Wang<sup>\*</sup>*

## Supplementary Figures:

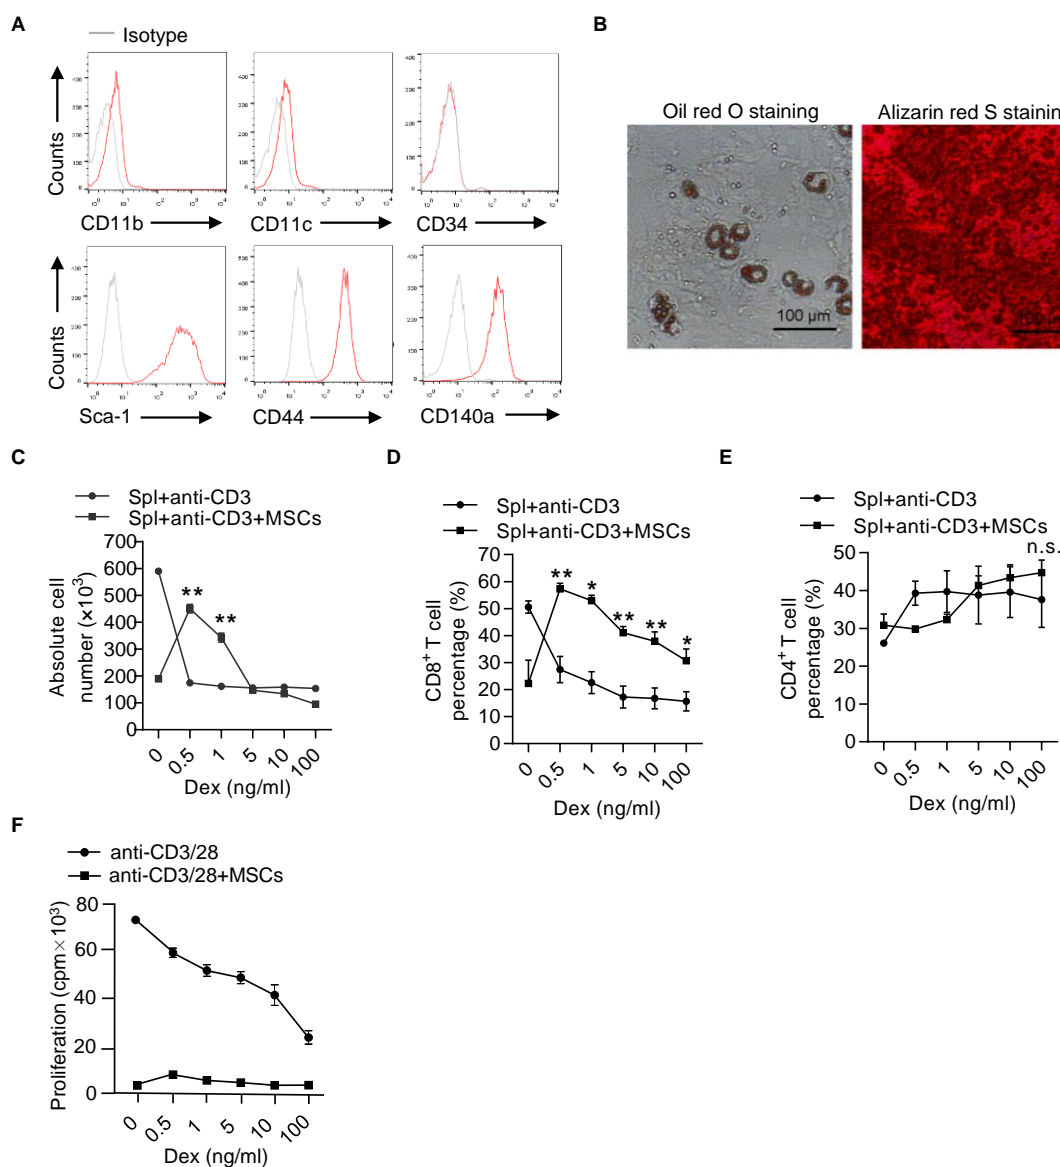

**Figure S1.** CD4<sup>+</sup> T cells are not involved in immune promotion by Dex-treated MSCs. A) Flow cytometric analysis of the expressions of CD11b, CD11c, CD34, Sca-1, CD44 and CD140a in MSCs. B) Oil red O staining and Alizarin red S staining of MSCs cultured in adipogenic and osteogenic differentiation medium for 7 and 21 days, respectively. C) Splenocytes were activated by anti-CD3 and co-cultured with or without MSCs in the presence or absence of Dex at indicated concentrations, and the total cell numbers were counted. D-E) Flow cytometric analysis of the percentages of CD4<sup>+</sup> T cells and CD8<sup>+</sup> T cells among splenocytes. F) The proliferation of CD4<sup>+</sup> T cells. CD4<sup>+</sup> T cells isolated from the mouse spleen were stimulated with anti-CD3 and anti-CD28 with or without MSCs, in the presence or absence of Dex at indicated concentrations. Cell proliferation was assessed by <sup>3</sup>H-

thymidine incorporation. Data are presented as mean  $\pm$  SEM. n.s., no significance, \* $p < 0.05$  and \*\* $p < 0.01$ .

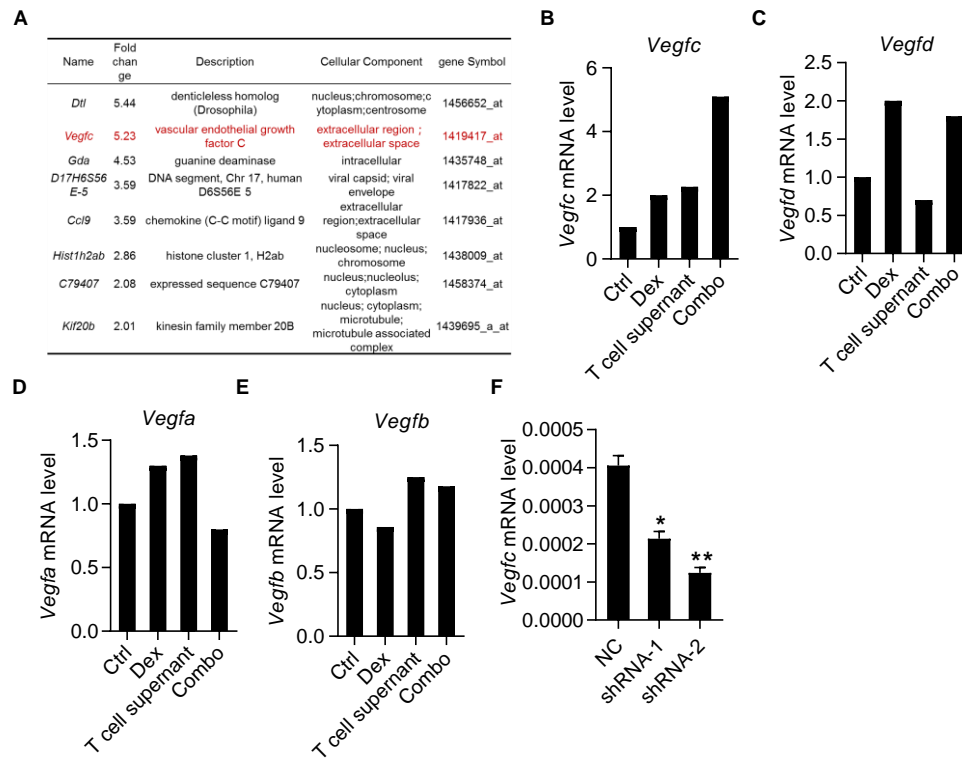

**Figure S2.** Expressions of VEGF family members in MSCs upon Dex treatment. A) Top 9 up-regulated genes in MSCs by Dex in the presence of activated T cells. Four groups were presented, including MSCs (G1), MSCs with Dex treatment (G2), MSCs co-cultured with CD8<sup>+</sup> T cells (G3) and MSCs co-cultured with CD8<sup>+</sup> T cells and with Dex treatment (G4). B-E) mRNA expressions of *Vegfc*, *Vegfd*, *Vegfa* and *Vegfb* in MSCs stimulated with activated T cell supernatant, with or without Dex addition. F) Efficiency of short hairpin RNA (shRNA)-mediated *Vegfc* knockdown in MSCs. NC, scramble shRNA control. Data are presented as mean  $\pm$  SEM. \* $p < 0.05$  and \*\* $p < 0.01$ .

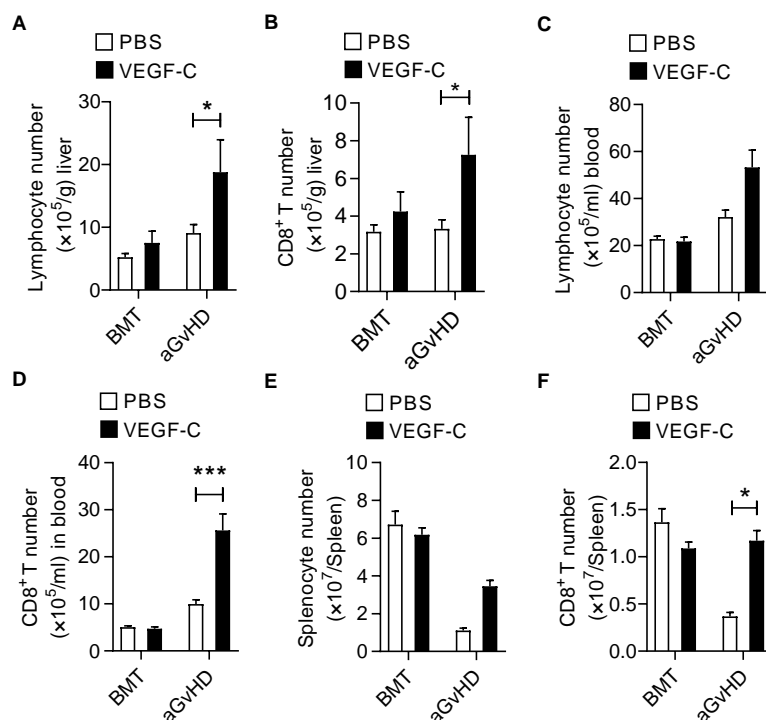

**Figure S3.** The influence of VEGF-C on the numbers of immune cells in the liver, blood and spleen of aGvHD mice. A-B) The numbers of lymphocytes (A) and CD8<sup>+</sup> T cells (B) in the liver of aGvHD mice treated with PBS or VEGF-C. Lethally irradiated C3H  $\times$  C57 BL/6 F1 mice were adoptively transferred with bone marrow cells ( $5 \times 10^6$ ) and splenocytes ( $5 \times 10^7$ ) from C57BL/6 mice to induce aGvHD. On day 7 post aGvHD induction, mice were *i.p.* injected with VEGF-C at 10  $\mu$ g per mouse daily. For the BMT group, recipient mice were adoptively transferred with bone marrow cells ( $5 \times 10^6$ ), with or without VEGF-C administration. C-D) The numbers of lymphocytes (C) and CD8<sup>+</sup> T cells (D) in peripheral blood of aGvHD mice treated with PBS or VEGF-C. E-F) Numbers of splenocytes (E) and CD8<sup>+</sup> T cells (F) in the spleen of aGvHD mice treated with PBS or VEGF-C. Data are presented as mean  $\pm$  SEM. \* $p < 0.05$  and \*\*\* $p < 0.001$ .

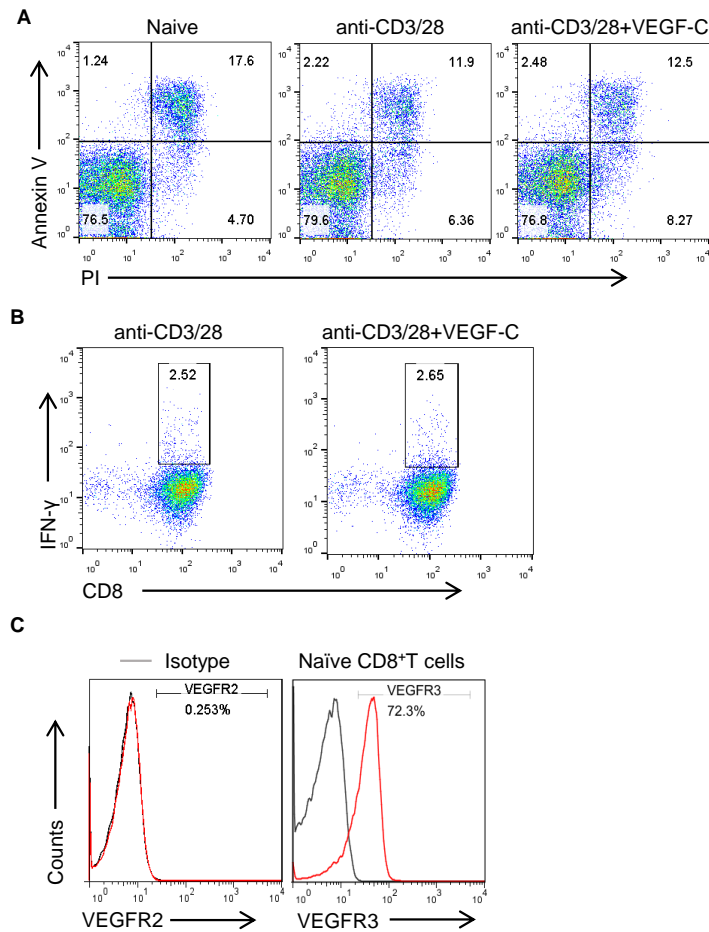

**Figure S4.** The effects of VEGF-C on CD8<sup>+</sup> T cell apoptosis and IFN- $\gamma$  expression. A) Flow cytometric analysis of apoptotic cells among CD8<sup>+</sup> T cells activated with anti-CD3 and anti-CD28 for 48 hours, in the presence or absence of VEGF-C (800 ng/ml). B) Flow cytometric analysis of IFN- $\gamma$  expression in CD8<sup>+</sup> T cells stimulated with anti-CD3 and anti-CD28 in the presence of VEGF-C. C) Flow cytometric analysis of the expressions of VEGFR2 and VEGFR3 on naïve CD8<sup>+</sup> T cells.

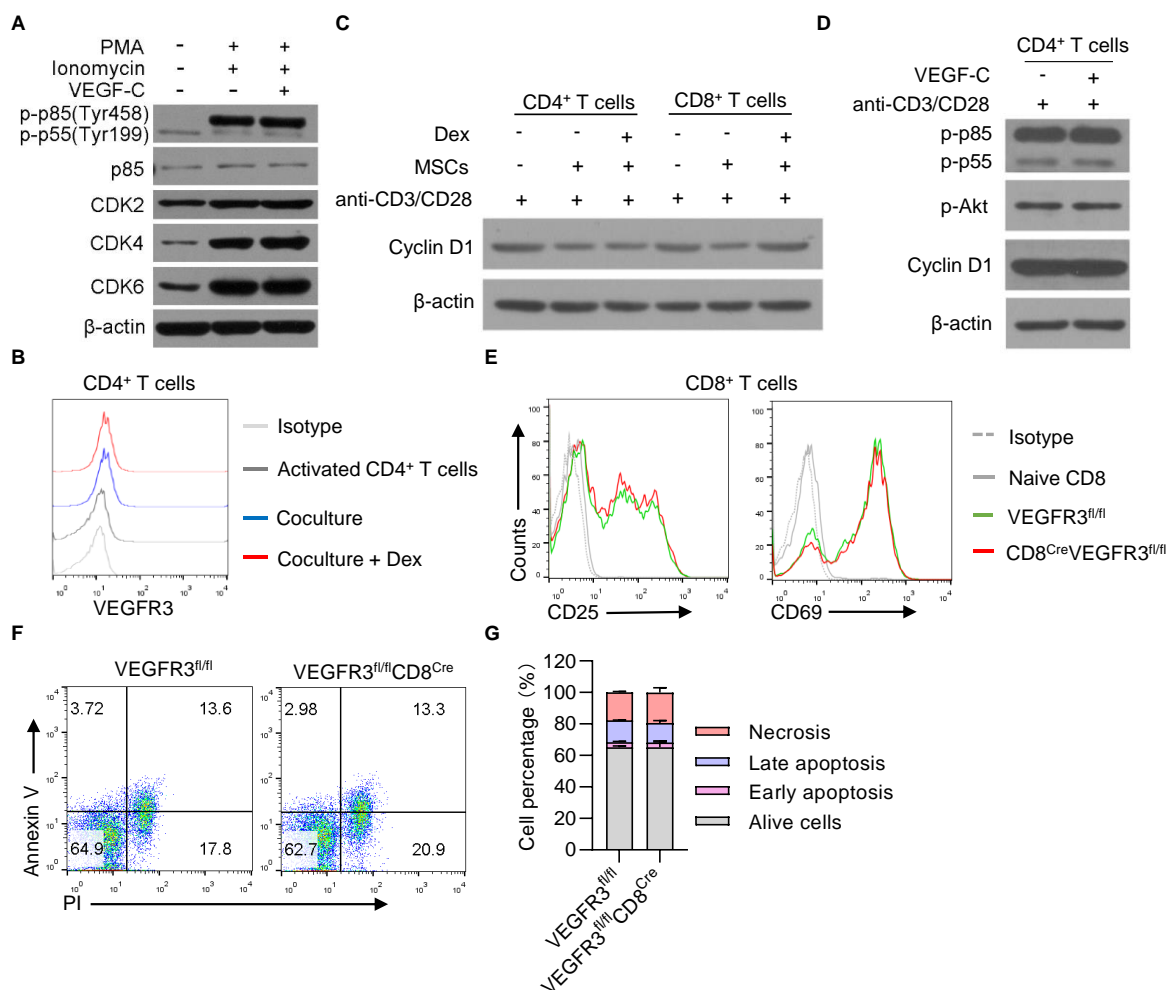

**Figure S5.** Activation and apoptosis in CD8<sup>+</sup> T cells isolated from VEGFR3<sup>fl/fl</sup> and VEGFR3<sup>fl/fl</sup>CD8<sup>Cre</sup> mice. A) Immunoblotting analysis of total p85, phosphorylated p85/p55, CDK2, CDK4, and CDK6 in CD8<sup>+</sup> T cells stimulated with PMA and ionomycin. β-actin was used as a loading control. B) Flow cytometric analysis of the expression of VEGFR3 on CD4<sup>+</sup> T cells co-cultured with MSCs, with or without Dex (10 ng/ml) addition. C) Immunoblotting analysis of Cyclin D1 expression in CD4<sup>+</sup> T cells and CD8<sup>+</sup> T cells co-cultured with MSCs, with or without Dex (10 ng/ml) addition. D) Immunoblotting analysis of the expressions of p-p85/p-p55, p-Akt and Cyclin D1 in CD4<sup>+</sup> T cells stimulated with anti-CD3 and anti-CD28 and in the presence or absence of VEGF-C (800 ng/ml). E) Flow cytometric analysis of the expressions of CD25 and CD69 on CD8<sup>+</sup> T cells activated by anti-CD3 and anti-CD28. F-G) Flow cytometric analysis of apoptotic cells in anti-CD3 and anti-CD28 activated CD8<sup>+</sup> T cells isolated from VEGFR3<sup>fl/fl</sup> and VEGFR3<sup>fl/fl</sup>CD8<sup>Cre</sup> mice.

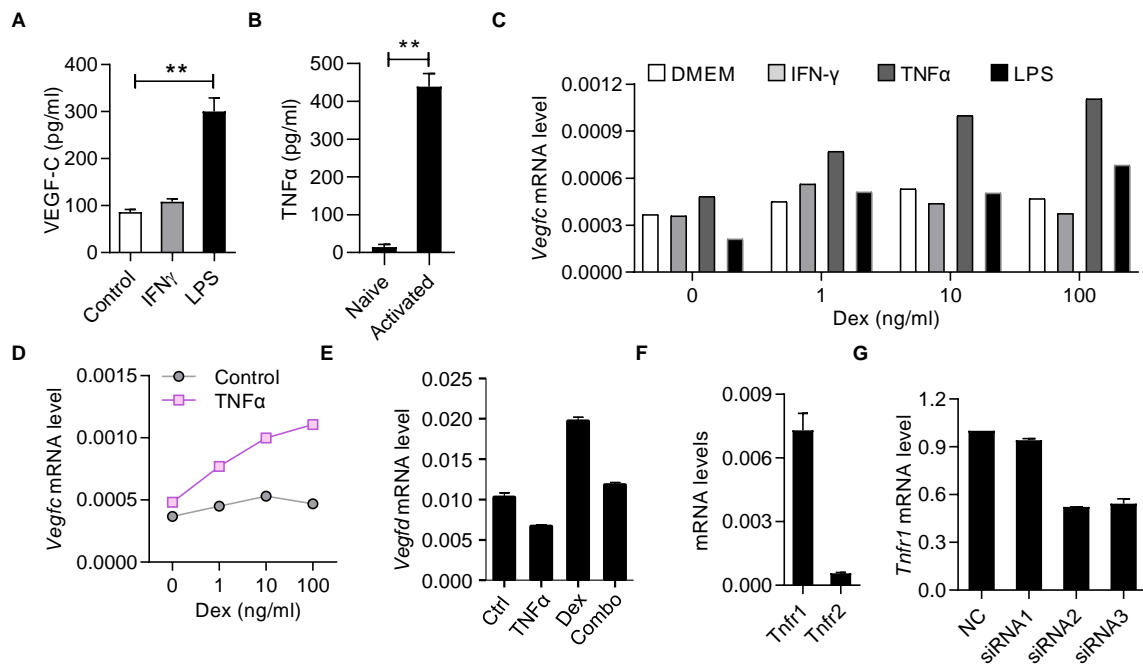

**Figure S6.** TNF $\alpha$  and Dex synergistically enhance VEGF-C expression in MSCs. A) The protein levels of VEGF-C in the supernatant of MSCs treated with PBS, LPS (100 ng/ml) or IFN- $\gamma$  (10 ng/ml). B) The protein level of TNF $\alpha$  in the supernatant of CD8<sup>+</sup> T cells stimulated with anti-CD3 and anti-CD28. C) *Vegfc* mRNA expressions in MSCs stimulated with LPS (20 ng/ml), IFN- $\gamma$  (5 ng/ml) or TNF $\alpha$  (5 ng/ml) and treated with Dex at indicated concentrations. D) mRNA expressions of *Vegfc* in MSCs treated with TNF $\alpha$  (5 ng/ml) and Dex at indicated concentrations. E) mRNA expressions of *Vegfd* in MSCs treated with TNF $\alpha$  (10 ng/ml), Dex (10 ng/ml) or their combination. F) mRNA expressions of *Tnfr1* and *Tnfr2* in MSCs. G) Efficiency of siRNA-mediated *Tnfr1* knockdown in MSCs. NC: scramble siRNA control. Data are presented as mean  $\pm$  SEM. \*\* $p < 0.01$ .
